# Supplementary material for: Downregulation of HuR Inhibits the Progression of Esophageal Cancer through Interleukin-18
Source: PubMed Central journal article supplement — Cancer Res Treat. 2017 Feb 24;50(1):71–87. doi: 10.4143/crt.2017.013 (PMC5784622; doi:10.4143/crt.2017.013), 2017-02-24
Supplement: crt-2017-013-suppl1.pdf [file crt-2017-013-suppl1.pdf]

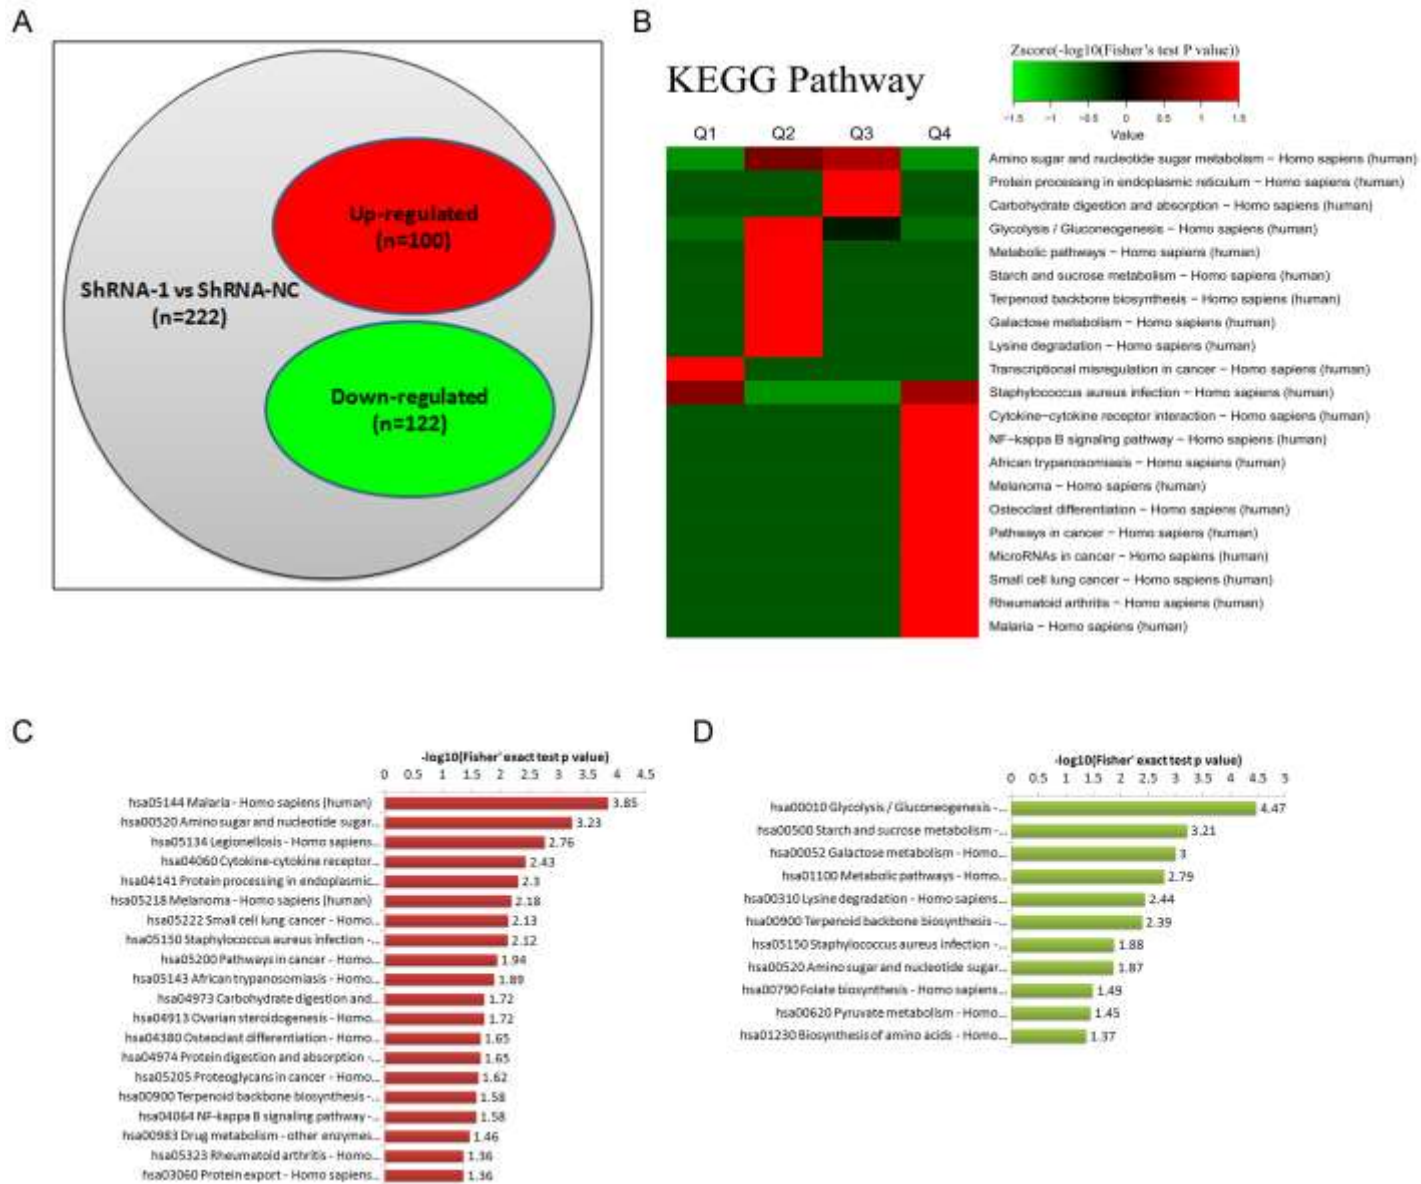

**S1 Fig.** Proteomics screening of HuR related proteins. (A) The number of upregulated and downregulated proteins from the proteomics analysis after downregulation of HuR in TE-1. (B) KEGG pathway enrichment-based clustering analysis. (C) KEGG pathway-based enrichment analysis of upregulated proteins (shRNA-1 vs. shRNA-NC). (D) KEGG pathway-based enrichment analysis of downregulated proteins (shRNA-1 vs. shRNA-NC).
