# Supplementary material for: Downregulation of HuR Inhibits the Progression of Esophageal Cancer through Interleukin-18
Source: PubMed Central journal article supplement — Cancer Res Treat. 2017 Feb 24;50(1):71–87. doi: 10.4143/crt.2017.013 (PMC5784622; doi:10.4143/crt.2017.013), 2017-02-24
Supplement: crt-2017-013-suppl2.pdf [file crt-2017-013-suppl2.pdf]

**S2 Table.** The top 20 upregulated proteins were selected according to the ratio of shRNA-1 vs shRNA-NC

| <b>Protein description</b>                                    | <b>shRNA-1 vs shRNA-NC ratio</b> | <b>Regulated type</b> | <b>p-value</b> |
|---------------------------------------------------------------|----------------------------------|-----------------------|----------------|
| Protein transport protein Sec24D                              | 1.789                            | Up                    | 4.84E-05       |
| "Keratin, type I cytoskeletal 17"                             | 1.714                            | Up                    | 9.27E-07       |
| Fibronectin                                                   | 1.692                            | Up                    | 9.20E-04       |
| E3 ubiquitin-protein ligase TRAF7                             | 1.685                            | Up                    | 1.24E-03       |
| ATPase family AAA domain-containing protein 3B                | 1.611                            | Up                    | 9.70E-05       |
| Nestin                                                        | 1.564                            | Up                    | 1.69E-03       |
| Prostaglandin G/H synthase 2                                  | 1.551                            | Up                    | 4.99E-03       |
| "Keratin, type II cytoskeletal 80"                            | 1.541                            | Up                    | 1.54E-05       |
| Cyclin-dependent kinase 6                                     | 1.535                            | Up                    | 1.59E-04       |
| Mucin-1                                                       | 1.519                            | Up                    | 1.88E-03       |
| Intercellular adhesion molecule 1                             | 1.506                            | Up                    | 6.52E-03       |
| Minor histocompatibility antigen H13                          | 1.491                            | Up                    | 2.16E-03       |
| Disabled homolog 2                                            | 1.488                            | Up                    | 1.98E-08       |
| Melanoma-associated antigen D2                                | 1.454                            | Up                    | 8.26E-13       |
| Bifunctional 3'-phosphoadenosine 5'-phosphosulfate synthase 2 | 1.442                            | Up                    | 1.37E-03       |
| Pyridoxal-dependent decarboxylase domain-containing protein 1 | 1.433                            | Up                    | 5.11E-15       |
| Hepatocyte growth factor receptor                             | 1.415                            | Up                    | 1.01E-04       |
| Phosphoacetylglucosamine mutase                               | 1.398                            | Up                    | 5.26E-05       |
| Nuclear factor NF-kappa-B p100 subunit                        | 1.372                            | Up                    | 4.12E-02       |
| Interleukin-18 <sup>a)</sup>                                  | 1.35                             | Up                    | 1.05E-04       |

<sup>a)</sup>Interleukin 18 was in the list of the top 20 upregulated proteins.
