# Supplementary material for: Downregulation of HuR Inhibits the Progression of Esophageal Cancer through Interleukin-18
Source: PubMed Central journal article supplement — Cancer Res Treat. 2017 Feb 24;50(1):71–87. doi: 10.4143/crt.2017.013 (PMC5784622; doi:10.4143/crt.2017.013), 2017-02-24
Supplement: crt-2017-013-suppl3.pdf [file crt-2017-013-suppl3.pdf]

**S3 Table.** The top 20 downregulated proteins were selected according to the ratio of shRNA-1 vs shRNA-NC

| <b>Protein description</b>                                            | <b>shRNA-1 vs shRNA-NC ratio</b> | <b>Regulated type</b> | <b>p-value</b> |
|-----------------------------------------------------------------------|----------------------------------|-----------------------|----------------|
| Protein MEMO1                                                         | 0.832                            | Down                  | 3.73E-07       |
| Protein furry homolog-like                                            | 0.83                             | Down                  | 7.48E-03       |
| Ataxin-2                                                              | 0.83                             | Down                  | 8.88E-03       |
| Proteasomal ATPase-associated factor 1                                | 0.83                             | Down                  | 4.51E-02       |
| NEDD8 ultimate buster 1                                               | 0.83                             | Down                  | 9.63E-03       |
| Cytoplasmic dynein 1 light intermediate chain 2                       | 0.828                            | Down                  | 1.88E-02       |
| Eukaryotic translation initiation factor 2D                           | 0.828                            | Down                  | 3.19E-05       |
| "1,4-alpha-glucan-branching enzyme"                                   | 0.828                            | Down                  | 3.68E-05       |
| Probable ATP-dependent RNA helicase DDX59                             | 0.828                            | Down                  | 9.39E-04       |
| E3 ubiquitin-protein ligase RNF169                                    | 0.828                            | Down                  | 1.05E-02       |
| CDGSH iron-sulfur domain-containing protein 1                         | 0.828                            | Down                  | 2.26E-03       |
| Mevalonate kinase                                                     | 0.826                            | Down                  | 2.81E-03       |
| N-acylneuraminate cytidylyltransferase                                | 0.826                            | Down                  | 2.82E-06       |
| GPI-anchor transamidase                                               | 0.826                            | Down                  | 2.33E-02       |
| "Acetyl-coenzyme A synthetase, cytoplasmic"                           | 0.826                            | Down                  | 6.16E-03       |
| RNA-binding protein 8A                                                | 0.826                            | Down                  | 2.65E-02       |
| Tumor necrosis factor receptor type 1-associated DEATH domain protein | 0.825                            | Down                  | 2.79E-02       |
| Guanine deaminase                                                     | 0.825                            | Down                  | 4.00E-09       |
| RNA-binding protein Musashi homolog 2                                 | 0.823                            | Down                  | 2.12E-04       |
| Oxidoreductase HTATIP2                                                | 0.823                            | Down                  | 1.65E-04       |
